# Supplementary material for: Ubiquitin proteolysis of a CDK-related kinase regulates titan cell formation and virulence in the fungal pathogen Cryptococcus neoformans
Source: PubMed Central journal article supplement (PMC9613880; doi:10.1038/s41467-022-34151-6), 2022-10-27
Supplement: 41467_2022_34151_MOESM1_ESM.pdf [file 41467_2022_34151_MOESM1_ESM.pdf]

**Supplementary information**

**Ubiquitin proteolysis of a CDK-related kinase regulates titan cell formation and virulence in the fungal pathogen *Cryptococcus neoformans***

Chengjun Cao<sup>1</sup>, Keyi Wang<sup>2</sup>, Yina Wang<sup>1</sup>, Tong-Bao Liu<sup>1\*</sup>, Amariliz Rivera<sup>2</sup>, Chaoyang Xue<sup>1,3,4</sup>

<sup>1</sup>Public Health Research Institute, New Jersey Medical School, Rutgers University, Newark, NJ 07103

<sup>2</sup>Center for Immunity and Inflammation, New Jersey Medical School, Rutgers University, Newark, NJ 07103

<sup>3</sup>Department of Microbiology, Biochemistry and Molecular Genetics, New Jersey Medical School, New Jersey Medical School, Rutgers University, Newark, NJ 07103

<sup>4</sup>Rutgers Center for Lipid Research, Rutgers University, New Brunswick, NJ 08901

\*Current address: State Key Laboratory of Silkworm Genome Biology, Southwest University, Chongqing 400715, China.

Supplementary Table 1 Strains and plasmids used in this study.

| Strains | Genotype                                                                                            | Source/reference |
|---------|-----------------------------------------------------------------------------------------------------|------------------|
| H99     | MATalpha                                                                                            | 1                |
| KN99a   | MATa                                                                                                | 2                |
| AI187   | MATa/alpha                                                                                          | 3                |
| CDX36   | MATalpha <i>gpa1::NAT ura5</i>                                                                      | 4                |
| CDX37   | MATa <i>gpa1::NEO ura5</i>                                                                          | 4                |
| CDX40   | MATa <i>gpa1::NAT ura5 P<sub>GPD1</sub>-GPA1<sup>Q284L</sup>:FLAG-URA</i>                           | 4                |
| CDX156  | MATalpha <i>P<sub>GPD1</sub>-GPA1<sup>Q284L</sup></i>                                               | 4                |
| CUX1    | MATa <i>crk1::NEO</i>                                                                               | This study       |
| CUX2    | MATalpha <i>fbp1::NEO</i>                                                                           | 5                |
| CUX3    | MATa <i>fbp1::NEO</i>                                                                               | 5                |
| CUX5    | MATalpha <i>fbp1::NEO FBPI-NAT</i>                                                                  | 5                |
| CUX6    | MATa <i>fbp1::NEO FBPI-NAT</i>                                                                      | 5                |
| CUX10   | MATalpha <i>crk1::NEO</i>                                                                           | This study       |
| CUX41   | MATa <i>crk1::NEO CRK1-NAT</i>                                                                      | This study       |
| CUX63   | MATalpha <i>crk1::NEO CRK1-NAT</i>                                                                  | This study       |
| CUX83   | MATalpha <i>ura5</i>                                                                                | This study       |
| CUX84   | MATa <i>ura5</i>                                                                                    | This study       |
| CUX87   | MATalpha <i>fbp1::NEO ura5</i>                                                                      | This study       |
| CUX91   | MATa <i>crk1::NEO ura5</i>                                                                          | This study       |
| CUX93   | MATalpha <i>crk1::NEO ura5</i>                                                                      | This study       |
| CUX118  | MATalpha <i>P<sub>CTR4</sub>-CRK1:HA-NAT</i>                                                        | This study       |
| CUX119  | MATalpha <i>fbp1::NEO P<sub>CTR4</sub>-CRK1:HA-NAT</i>                                              | This study       |
| CUX134  | MATalpha <i>fbp1::NEO ura5 P<sub>ACT1</sub>-FBPI:FLAG-URA5</i>                                      | This study       |
| CUX135  | MATalpha <i>fbp1::NEO ura5 P<sub>ACT1</sub>-FBPI<sup>ΔF</sup>:FLAG-URA5</i>                         | This study       |
| CUX140  | MATalpha <i>fbp1::NEO P<sub>ACT1</sub>-FBPI:FLAG-URA5 P<sub>CTR4</sub>-CRK1:HA-NAT</i>              | This study       |
| CUX141  | MATalpha <i>fbp1::NEO P<sub>ACT1</sub>-FBPI<sup>ΔF</sup>:FLAG-URA5 P<sub>CTR4</sub>-CRK1:HA-NAT</i> | This study       |
| CUX151  | MATalpha <i>P<sub>HIS</sub>-GFP:CRK1:HA-NAT</i>                                                     | This study       |
| CUX152  | MATalpha <i>fbp1::NEO P<sub>HIS</sub>-GFP:CRK1:HA-NAT</i>                                           | This study       |
| CUX154  | MATa <i>P<sub>HIS</sub>-GFP:CRK1:HA-NAT</i>                                                         | This study       |
| CUX191  | MATalpha <i>gpa1::NAT ura5 P<sub>ACT1</sub>-CRK1:mCherry</i>                                        | This study       |
| CUX192  | MATa <i>gpa1::NAT ura5 P<sub>ACT1</sub>-CRK1:mCherry</i>                                            | This study       |
| CUX193  | MATalpha <i>crk1::NEO ura5 P<sub>GPD1</sub>-GPA1<sup>Q284L</sup></i>                                | This study       |
| CUX194  | MATa <i>crk1::NEO ura5 P<sub>GPD1</sub>-GPA1<sup>Q284L</sup></i>                                    | This study       |
| CUX221  | MATalpha <i>fbp1::NEO P<sub>CRK1</sub>-CRK1:HA-NAT</i>                                              | This study       |
| CUX222  | MATalpha <i>P<sub>CRK1</sub>-CRK1:HA-NAT</i>                                                        | This study       |
| CUX1131 | MATalpha <i>P<sub>CTR4</sub>-CRK1<sup>ΔPEST</sup>:HA-NAT</i>                                        | This study       |
| CUX1132 | MATalpha <i>fbp1::NEO P<sub>CTR4</sub>-CRK1<sup>ΔPEST</sup>:HA-NAT</i>                              | This study       |
| CUX1135 | MATalpha <i>P<sub>HIS</sub>-GFP:CRK1:HA-NAT ura5</i>                                                | This study       |
| CUX1167 | MATa <i>crk1::NEO CRK1-NAT ura5</i>                                                                 | This study       |
| CUX1196 | MATalpha <i>ura5 P<sub>GPD1</sub>-GPA1:FLAG-URA</i>                                                 | This study       |
| CUX1197 | MATalpha <i>crk1::NEO ura5 P<sub>GPD1</sub>-GPA1:FLAG-URA</i>                                       | This study       |
| CUX1198 | MATalpha <i>P<sub>HIS</sub>-GFP:CRK1:HA-NAT ura5 P<sub>GPD1</sub>-GPA1:FLAG-URA</i>                 | This study       |
| CUX1200 | MATa <i>crk1::NEO CRK1-NAT ura5 P<sub>GPD1</sub>-GPA1:FLAG-URA</i>                                  | This study       |
| CUX1205 | MATalpha <i>ura5 P<sub>GPD1</sub>-GPA1:FLAG-URA P<sub>CTR4</sub>-CRK1:HA-NAT</i>                    | This study       |
| CUX1235 | MATalpha <i>ura5 P<sub>ACT1</sub>-GPA1:GFP-URA</i>                                                  | This study       |
| CUX1237 | MATalpha <i>crk1::NEO ura5 P<sub>ACT1</sub>-GPA1:GFP-URA</i>                                        | This study       |
| CUX1238 | MATa <i>crk1::NEO CRK1-NAT ura5 P<sub>ACT1</sub>-GPA1:GFP-URA</i>                                   | This study       |
| CUX1239 | MATalpha <i>P<sub>HIS</sub>-GFP:CRK1:HA-NAT ura5 P<sub>GPD1</sub>-GPA1:FLAG-URA</i>                 | This study       |
| CUX1291 | MATalpha <i>P<sub>ACT1</sub>-CRK1:mCherry-NAT</i>                                                   | This study       |
| CUX1293 | MATalpha <i>P<sub>ACT1</sub>-CRK1<sup>ΔPEST</sup>:mCherry-NAT</i>                                   | This study       |
| CUX1309 | MATalpha <i>P<sub>ACT1</sub>-mCherry-NAT</i>                                                        | This study       |
| CUX1328 | MATalpha <i>P<sub>ACT1</sub>-CRK1:mCherry-NAT ura5</i>                                              | This study       |

|          |                                                                                                       |            |
|----------|-------------------------------------------------------------------------------------------------------|------------|
| CUX1329  | MATalpha <i>P<sub>ACT1</sub>-CRK1<sup>ΔPEST</sup>:mCherry-NAT ura5</i>                                | This study |
| CUX1330  | MATalpha <i>P<sub>ACT1</sub>-CRK1:mCherry-NAT ura5 P<sub>GPD1</sub>-GPA1:FLAG-URA</i>                 | This study |
| CUX1331  | MATalpha <i>P<sub>ACT1</sub>-CRK1<sup>ΔPEST</sup>:mCherry-NAT ura5 P<sub>GPD1</sub>-GPA1:FLAG-URA</i> | This study |
| CUX1340  | MATalpha <i>P<sub>CTR4</sub>-HA</i>                                                                   |            |
| CUX1341  | MATalpha <i>fbp1::NEO ura5 P<sub>ACT1</sub>-GPA1:GFP-URA</i>                                          | This study |
| CUX1342  | MATalpha <i>fbp1::NEO ura5 P<sub>GPD1</sub>-GPA1:FLAG-URA</i>                                         | This study |
| Plasmids | Description                                                                                           |            |
| pCTR4-2  | A vector contains the CTR4 inducible promoter                                                         | 6          |
| pCN19    | <i>P<sub>HIS</sub>-GFP</i>                                                                            | 7          |
| pCXU4    | pGADT7+FBP1 (CX34/CX36, BamHI/XhoI)                                                                   | This study |
| pCXU24   | pGBKT7+CRK1 (CX79/CX33, SfiI/BamHI)                                                                   | This study |
| pCXU29   | pGBKT7 + CRK1CT (CX90/CX33, EcoRI/BamHI)                                                              | This study |
| pCXU49   | pGADT7+FBP1 <sup>ΔF</sup> (CX34/CX36, BamHI/XhoI)                                                     | This study |
| pCXU83   | <i>P<sub>ACT1</sub>-CRK1:mCherry</i> (CX227/CX230, BamHI/NotI)                                        | This study |
| pCXU97   | pJAF13 + CRK1:HA (CX80/CX298, XbaI/XhoI)                                                              | This study |
| pCXU108  | <i>P<sub>CTR4</sub>-CRK1:HA</i> (CX394/CX395, BamHI)                                                  | This study |
| pCXU117  | <i>P<sub>ACT1</sub>-FBP1<sup>ΔF</sup>:FLAG</i> (CX225/CX443, BamHI/NotI)                              | This study |
| pCXU118  | <i>P<sub>ACT1</sub>-FBP1:FLAG</i> (CX225/CX443, BamHI/NotI)                                           | This study |
| pCXU160  | pCN19 + CRK1:HA (CX394/CX395, BamHI)                                                                  | This study |
| pCXU189  | pJAF13 + CRK1:HA (CX80/CX298, XbaI/XhoI)                                                              | This study |
| pCXU369  | <i>P<sub>CTR4</sub>-CRK1<sup>ΔPEST</sup>:HA</i> (CX1871/CX1561, BamHI)                                | This study |
| pCXU398  | <i>P<sub>ACT1</sub>-GPA1:GFP</i> (CX1921/CX1924, BamHI/NotI)                                          | This study |
| pCXU401  | <i>P<sub>ACT1</sub>-CRK1:mCherry</i> (CX1841/CX1314, BamHI)                                           | This study |
| pCXU402  | <i>P<sub>ACT1</sub>-CRK1<sup>ΔPEST</sup>:mCherry</i> (CX1841/CX1314, BamHI)                           | This study |
| pDX8     | pRCD83 + GPA1:FLAG (JOHE13094/JOHE13095, KpnI + SmaI)                                                 | 4          |
| pDX121   | pGADT7 + GPA1 (JOHE19001/JOHR19002, XmaI/XhoI)                                                        | 4          |
| pDX122   | pGADT7 + GPA1 <sup>Q284L</sup> (JOHE19001/JOHE19002, XmaI/XhoI)                                       | 4          |

## Reference

- 1 Perfect, J. R., Schell, W. A. & Rinaldi, M. G. Uncommon invasive fungal pathogens in the acquired immunodeficiency syndrome. *J Med Vet Mycol* **31**, 175-179 (1993).
- 2 Nielsen, K. *et al.* Sexual cycle of *Cryptococcus neoformans* var. *grubii* and virulence of congenic  $\alpha$  and  $\alpha$  isolates. *Infect Immun* **71**, 4831-4841, doi:10.1128/iai.71.9.4831-4841.2003 (2003).
- 3 Ianiri, G. & Idnurm, A. Essential gene discovery in the basidiomycete *Cryptococcus neoformans* for antifungal drug target prioritization. *Mbio* **6**, doi:10.1128/mBio.02334-14 (2015).
- 4 Xue, C., Bahn, Y. S., Cox, G. M. & Heitman, J. G protein-coupled receptor Gpr4 senses amino acids and activates the cAMP-PKA pathway in *Cryptococcus neoformans*. *Mol Biol Cell* **17**, 667-679, doi:10.1091/mbc.E05-07-0699 (2006).
- 5 Liu, T. B. *et al.* The F-Box protein Fbp1 regulates sexual reproduction and virulence in *Cryptococcus neoformans*. *Eukaryot Cell* **10**, 791-802, doi:10.1128/ec.00004-11 (2011).
- 6 Ory, J. J., Griffith, C. L. & Doering, T. L. An efficiently regulated promoter system for *Cryptococcus neoformans* utilizing the CTR4 promoter. *Yeast* **21**, 919-926, doi:10.1002/yea.1139 (2004).
- 7 Price, C. T. *et al.* Molecular mimicry by an F-box effector of *Legionella pneumophila* hijacks a conserved polyubiquitination machinery within macrophages and protozoa. *PLoS Pathog* **5**, e1000704, doi:10.1371/journal.ppat.1000704 (2009).

Supplementary Table 2 Primers used in this study

| Primers | Sequences (5'-3')                                                       | References/Note                          |
|---------|-------------------------------------------------------------------------|------------------------------------------|
| CX5     | GTAAAACGACGGCCAG                                                        | M13F                                     |
| CX6     | CAGGAAACAGCTATGAC                                                       | M13R                                     |
| CX25    | TCTGAGATGGGCGATGCTCTG                                                   | CRK1 KO F1                               |
| CX26    | CTGGCCGTCGTTTTACCATTGCGGAGCCTTTGGAAG                                    | CRK1 KO R1                               |
| CX27    | GTCATAGCTGTTTCTGAGGAGAGGGTCAGATCAATCC                                   | CRK1 KO F2                               |
| CX28    | CATGGTGATGGTAGATCCAAAG                                                  | CRK1 KO R2                               |
| CX29    | ACAGCAGCAGCAGATGTACC                                                    | CRK1 KO F3-1                             |
| CX30    | AAGTGGTCGTCCTCGACGAG                                                    | CRK1 KO R3-1                             |
| CX31    | TCACGCTTCTTTGGCACATCC                                                   | CRK1 KO F4                               |
| CX34    | CATGGGATCCACATGCCCCGTACGACCGTCAAG                                       | FBP1 YTH PGADT7 F                        |
| CX36    | CAGTCTCGAGTCAACGTCCGTTACCGAATC                                          | FBP1 YTH PGADT7 R                        |
| CX79    | ATGGCCATGGAGGCCATGTCGCAAGACTTTAGCGTCT                                   | CRK1 YTH PGBKT7 F                        |
| CX90    | AGGCCGAATTCGACAGCCAAGCTTCCACAG                                          | CRK1CT YTH PGBKT7 F                      |
| CX33    | CAGTGGATCCTTATTGTGGAGGATGAGACTGG                                        | CRK1/CRK1CT YTH PGBKT7 R                 |
| CX80    | CCTCTAGAGCCCCATCAACCCAATCTCACTACCTT                                     | CRK1 Comp / P <sub>CRK1</sub> -CRK1:HA F |
| CX81    | GCCACAAACTGCCGCCGCTACAT                                                 | CRK1 Comp R                              |
| CX298   | CGTACCTCGAGTTAAGCGTAATCTGGTACGTCGTATGG<br>GTATTGTGGAGGATGAGACTGGTTA     | P <sub>CRK1</sub> -CRK1:HA R             |
| CX82    | ATCGTGCGCCAGAAGTCTCCT                                                   | CRK1 KO F3-2                             |
| CX83    | TCCGCTTCCCTTCTTCGCCTTCT                                                 | CRK1 KO R3-2                             |
| CX198   | GAGTTGCGTGATTGTGTTCTTAATTTACCCCTTT                                      | FBP1 F-box KO R5                         |
| CX199   | GGTGAAATTAAGAACAACAATCACGCAACTCGCCTC                                    | FBP1 F-box KO F5                         |
| CX225   | CATAAATACAGGATCCATGCCCCGTACGACCGTCAAGAA                                 | P <sub>ACT1</sub> -FBP1:FLAG infusion F1 |
| CX443   | ACGCGGCCGCTTACTTATCGTCGTCATCCTTGTAATCAC<br>GTCCGTTACCGAATCGTTGT         | P <sub>ACT1</sub> -FBP1:FLAG infusion R1 |
| CX394   | GCAGCCCGGGGGATCCATGTCGCAAGACTTTAGCGTCT                                  | P <sub>CTR4</sub> -CRK1:HA infusion F1   |
| CX395   | TAGAACTAGTGGATCCTTAAGCGTAATCTGGTACGTCG<br>TA                            | P <sub>CTR4</sub> -CRK1:HA infusion R1   |
| CX1313  | GCAGCCCGGGGGATCCACTGTCGATCACTGCGCT                                      | P <sub>CRK1</sub> -CRK1:HA F2            |
| CX1314  | TAGAACTAGTGGATCCTTGTGGAGGATGAGACTGG                                     | P <sub>CRK1</sub> -CRK1:HA R2            |
| CX1841  | GCAGCCCGGGGGATCCATGTACCCATACGACGTACCAG<br>ATTACGCTATGACCTCGGCGCTCCTATTC | P <sub>CTR4</sub> -HACR1 infusion F2     |
| CX1561  | TCGTATGGGTAGGATCCTTGTGGAGGATGAGACTGG                                    | P <sub>CTR4</sub> -CRK1 infusion R2      |
| CX1598  | GACGAGCTAGCGTAGATGGAGGTTTTCAACTGGCTCCT<br>AG                            | CRK1 PEST KO R5                          |
| CX1599  | TCCATCTACGCTAGCTCGTC                                                    | CRK1 PEST KO F5                          |
| CX227   | CATAAATACAGGATCCATGTCGCAAGACTTTAGCGTCT                                  | CRK1 infusion F                          |
| CX228   | CGGTACCCGGGGATCCTTATTGTGGAGGATGAGACTGG                                  | CRK1:mCherry overlap R                   |
| CX229   | CGGGATCCACCGGTCGCCACCATGGACAACACCGAGGA<br>CGTCA                         | CRK1:mCherry overlap F                   |
| CX230   | CGGTACCCGGGGATCCTTATCTAGATCCGGTGGATCCC                                  | mCherry fusion R                         |
| CX1871  | TTCGGGTGGGATGTACCCATACGACGTACCAGATTAC<br>GCTATGACCTCGGCGCTCCTATTC       | HA:CRK1 OE F                             |
| CX1561  | TCGTATGGGTAGGATCCTTGTGGAGGATGAGACTGG                                    | HA:CRK1 OE R                             |
| CX1921  | CCAACATGTCTGGATCCATGGGCGGCTGTATGTCTACTC                                 | GPA1 infusion F                          |
| CX1922  | TGCTCACCATGGGCCCTAAGATAACCAGAGTCACGTAA                                  | GPA1:GFP overlap R                       |
| CX1923  | TAGGGCCCATGGTGAGCAAGGGCGAGGAG                                           | GPA1:GFP overlap F                       |
| CX1924  | ATTCTTTTACGCGGCCGCTTGTACAGCTCGTCCATG                                    | GFP infusion R                           |
| CX44    | GAAATGTCATCGCCTGTGTGCCAA                                                | FBP1 QRT-PCR F                           |
| CX45    | TGTCAAACCTGATCCTGCGGAGCA                                                | FBP1 QRT-PCR R                           |
| CX49    | TGAGAAGGACCCTGCCAACA                                                    | GAPDH QRT-PCR F                          |
| CX50    | ACTCCGGCTTGTAGGCATCAA                                                   | GAPDH QRT-PCR R                          |
| CX382   | ACCCGGTAAACTCAACAGG                                                     | PKA1 QRT-PCR F                           |

---

|         |                        |                |
|---------|------------------------|----------------|
| CX383   | GGGTACGGTGGATAAAGATGTC | PKA1 QRT-PCR R |
| JH12959 | TGAGGCTGATGTTCTGAGAG   | GPA1 QRT-PCR F |
| JH12960 | GCAACACTTGATCGTACTCTG  | GPA1 QRT-PCR R |

---

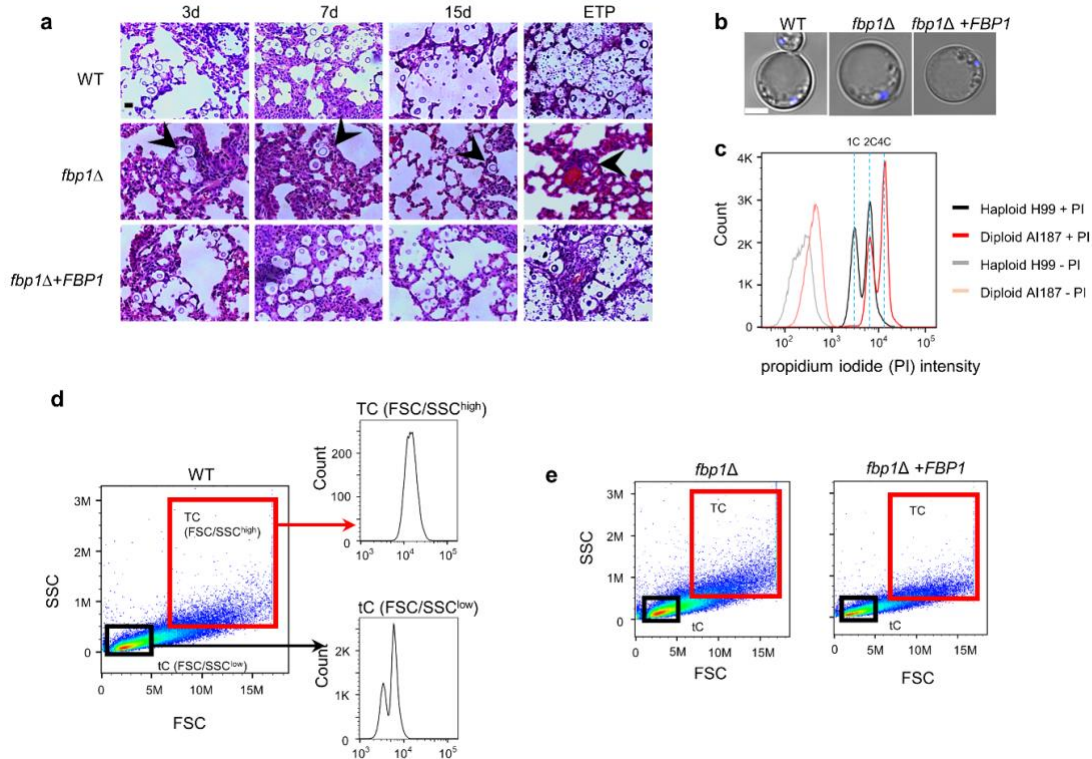

**Supplementary Figure 1 Large cells produced by the *fbp1*Δ mutant share the typical characteristics of titan cells.** **a** H&E-stained slides were prepared from cross sections of infected lungs at 3-, 7-, and 15-days post-infection and the end time point (ETP) and visualized by light microscopy. Images are representative of three mice. Arrows indicate yeast cells. Bar, 20 μm. **b** DAPI staining to show the cell nuclei of cells cultured in the in vitro titan cell inducing condition. **c** FACS analysis of the DNA content of haploid H99 and diploid AI187 strains. Cells were fixed and stained by propidium iodide (PI) after overnight culture in YPD. H99 has the standard G1 and G2 cell cycle peaks representing 1C and 2C DNA levels, and the two peaks of AI187 represent 2C and 4C DNA levels. +PI, PI staining; -PI, no PI staining. **d** Cells were cultured under titan cell inducing conditions for 3 days and analyzed by dot plots (FSC/SSC) using flow cytometry. Typical cells and titan cells of WT strains gated through the FSC-A vs SSC-A plot were further shown by the Histograms. The Histograms of typical cells and titan cells were overlaid for comparison as shown in Fig 1e. FSC/SSC<sup>high</sup> (red border) and FSC/SSC<sup>low</sup> (black border) represent titan cells (TC) and typical cells (tC), respectively. **e** Cells of the *fbp1*Δ, and *fbp1*Δ+*FBP1* strains were cultured under titan cell inducing conditions for 3 days and analyzed by dot plots (FSC/SSC) using flow cytometry. FSC/SSC<sup>high</sup> (red border) and FSC/SSC<sup>low</sup> (black border) represent titan cells (TC) and typical cells (tC), respectively.

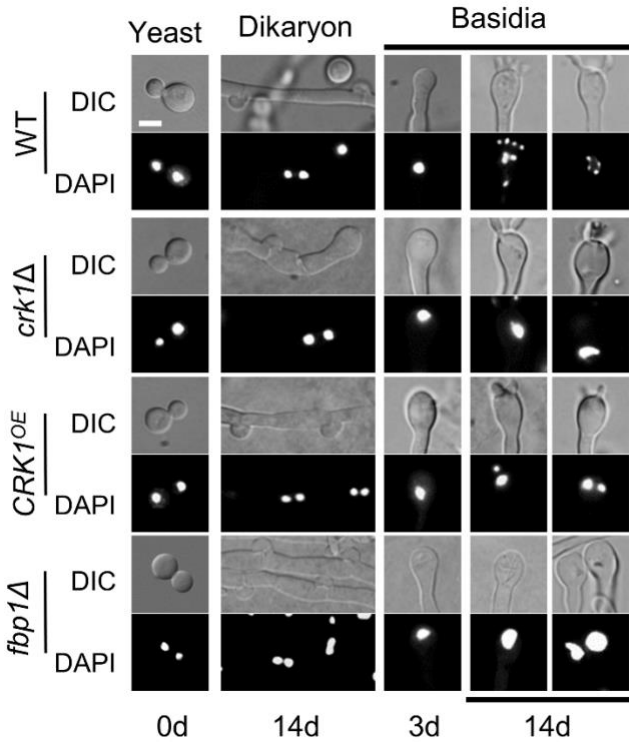

**Supplementary Figure 2 Crk1 is required for meiosis and sporulation.** Nuclear DAPI staining for yeast cells and mating structures of bilateral mating of the wild type, the *crk1Δ* mutant, the *CRK1<sup>OE</sup>* strain, and the *fbp1Δ* mutant. Mating structures from bilateral mating cultures at indicated incubation times were visualized under microscopy. DAPI staining was used to track the morphology and location of nuclei in the cells. Images are representative of three independent experiments. Bar, 5  $\mu$ m.

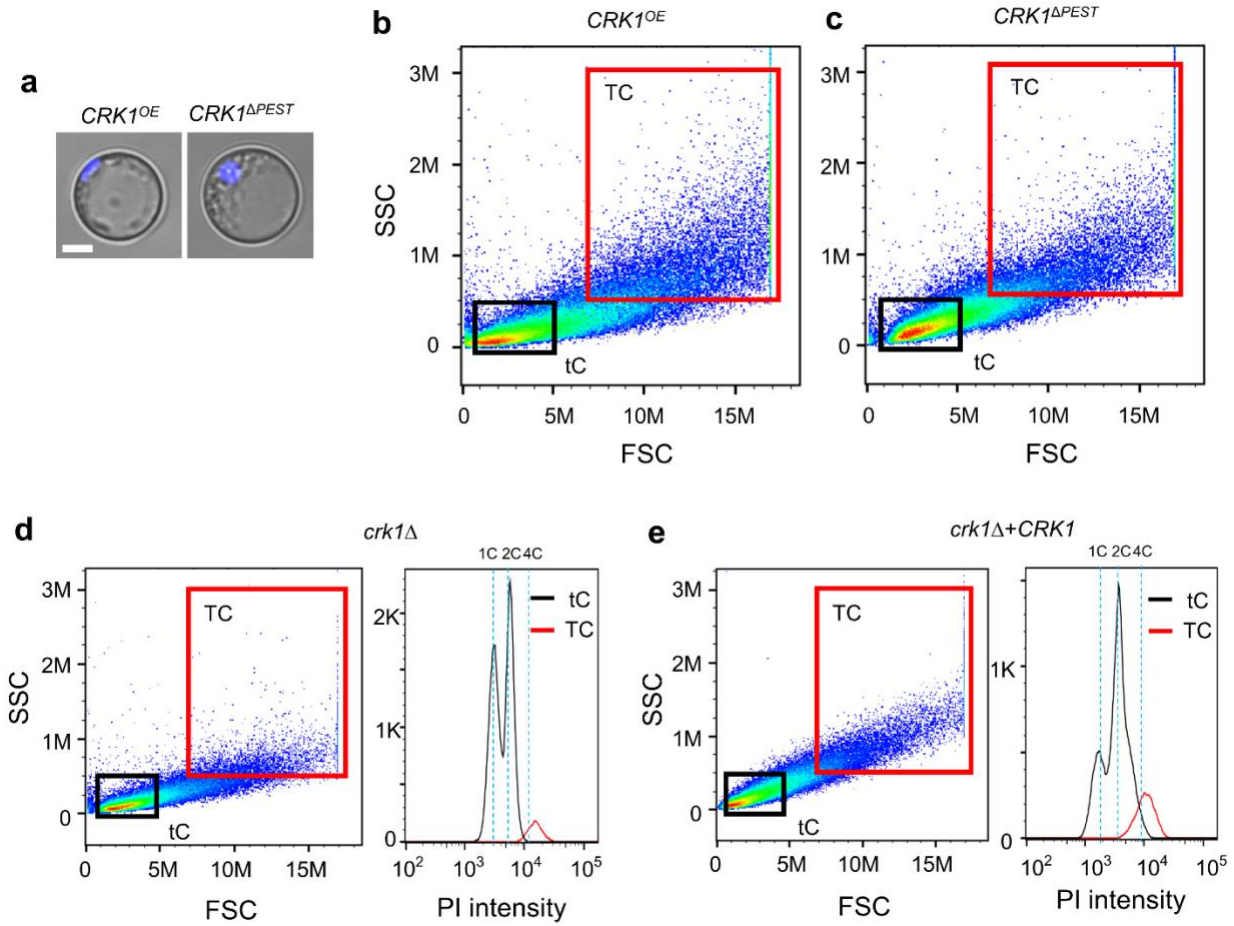

**Supplementary Figure 3 The large cells of the *CRK1<sup>OE</sup>* strain induced under *in vitro* condition are titan cells.** **a** DAPI staining to show the cell nuclei. Images are representative of three independent experiments. Bar, 5  $\mu$ m. **b-c** The *CRK1<sup>OE</sup>* (**b**) and the *CRK1<sup>ΔPEST</sup>* (**c**) strains were cultured under titan cell inducing conditions for 3 days and analyzed by dot plots (FSC/SSC) using flow cytometry. FSC/SSC<sup>high</sup> (red border) and FSC/SSC<sup>low</sup> (black border) represent titan cells (TC) and typical cells (tC), respectively. **d-e** FACS analysis of DNA content in the *crk1Δ* mutant (**d**) and the *crk1Δ+CRK1* strain (**e**). Cells were cultured under titan cell inducing conditions for 3 days and analyzed by flow cytometry. The population of titan cells showed increased PI fluorescence intensity to >2C.



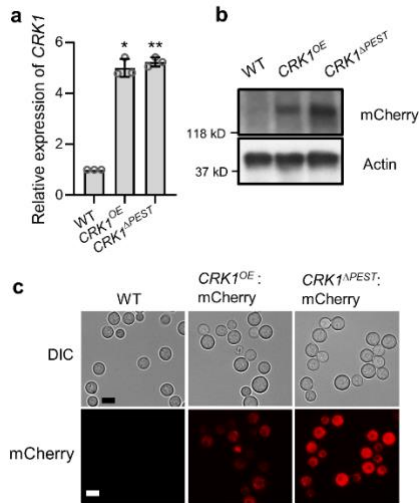

**Supplementary Figure 4 Deletion of the PEST domain stabilizes Crk1 protein.** **a** Relative expression levels of *CRK1* in wild type H99, the *CRK1<sup>OE</sup>* strain, and the *CRK1<sup>ΔPEST</sup>* strain under YPD culture condition. The expression level in *wild type* was set as 1. The data shown are cumulated from three independent experiments. Statistical analysis was performed with the two-sided Kruskal-Wallis nonparametric test for multiple comparisons. \*,  $P = 0.032$ . \*\*,  $P = 0.002$ . **b-c** The expression of Crk1:mCherry or Crk1<sup>ΔPEST</sup>:mCherry was detected by western blot (**b**) or fluorescence microscopy (**c**). Images are representative of three independent experiments. Bar, 5  $\mu$ m. Source data are provided as a Source Data file.

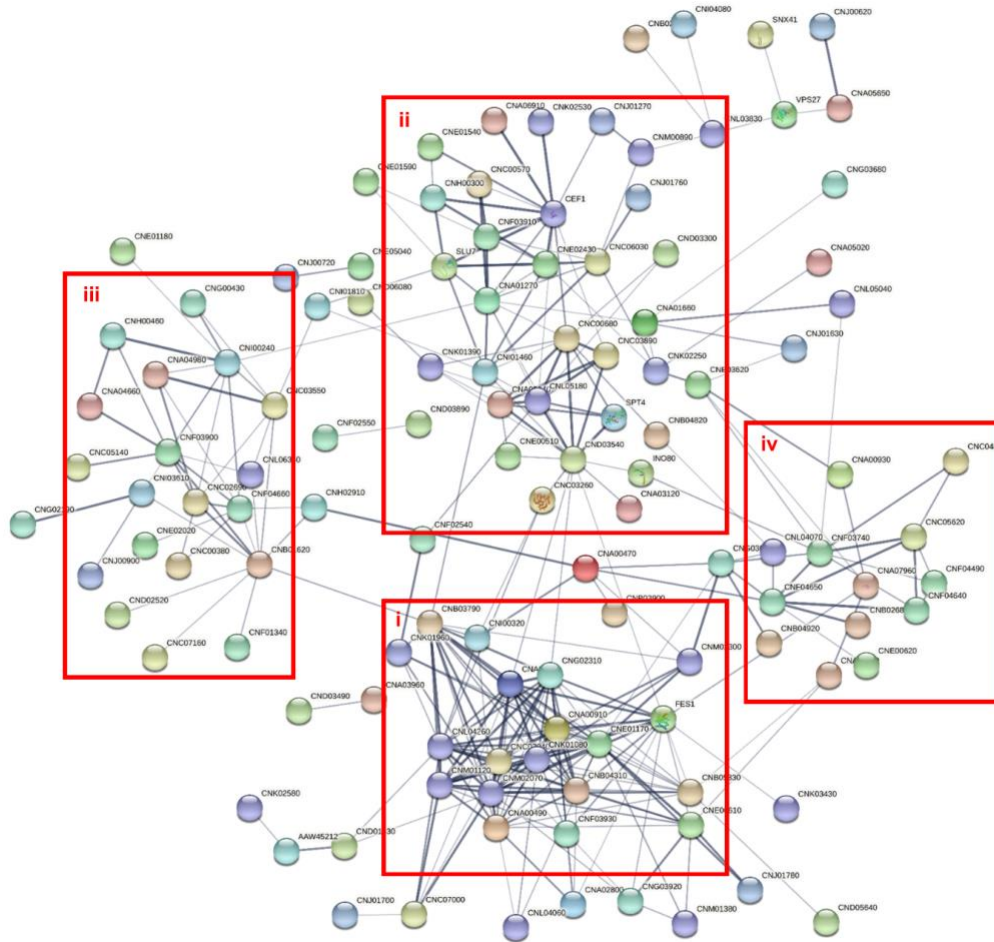

**Supplementary Figure 5 STRING analysis to predict interaction network of common DEGs in *fbp1* $\Delta$ , *CRK1*<sup>OE</sup>, and *CRK1* <sup>$\Delta$ PEST</sup> compared to WT.** The STRING (Search Tool for the Retrieval of Interacting Genes/Proteins) program was used to visualize predicted protein-protein interactions for predicted proteins encoded by the 247 common DEGs (<http://string-db.org>) using the corresponding proteins from *C. neoformans* strain JEC21 in the database. Clusters identified from the network mapping include (i) chaperone and heat-shock proteins involved in protein processing in endoplasmic reticulum, (ii) spliceosome, ribosome, DNA replication and repair proteins involved in pre-mRNA splicing and cell cycle control, (iii) lipid biosynthesis and metabolism, (iv) proteins associated with signaling regulation. Each node represents all the proteins produced by a single protein-coding gene locus. Edges represent protein-protein associations, which indicate proteins jointly contribute to a shared function and do not mean physical interaction.

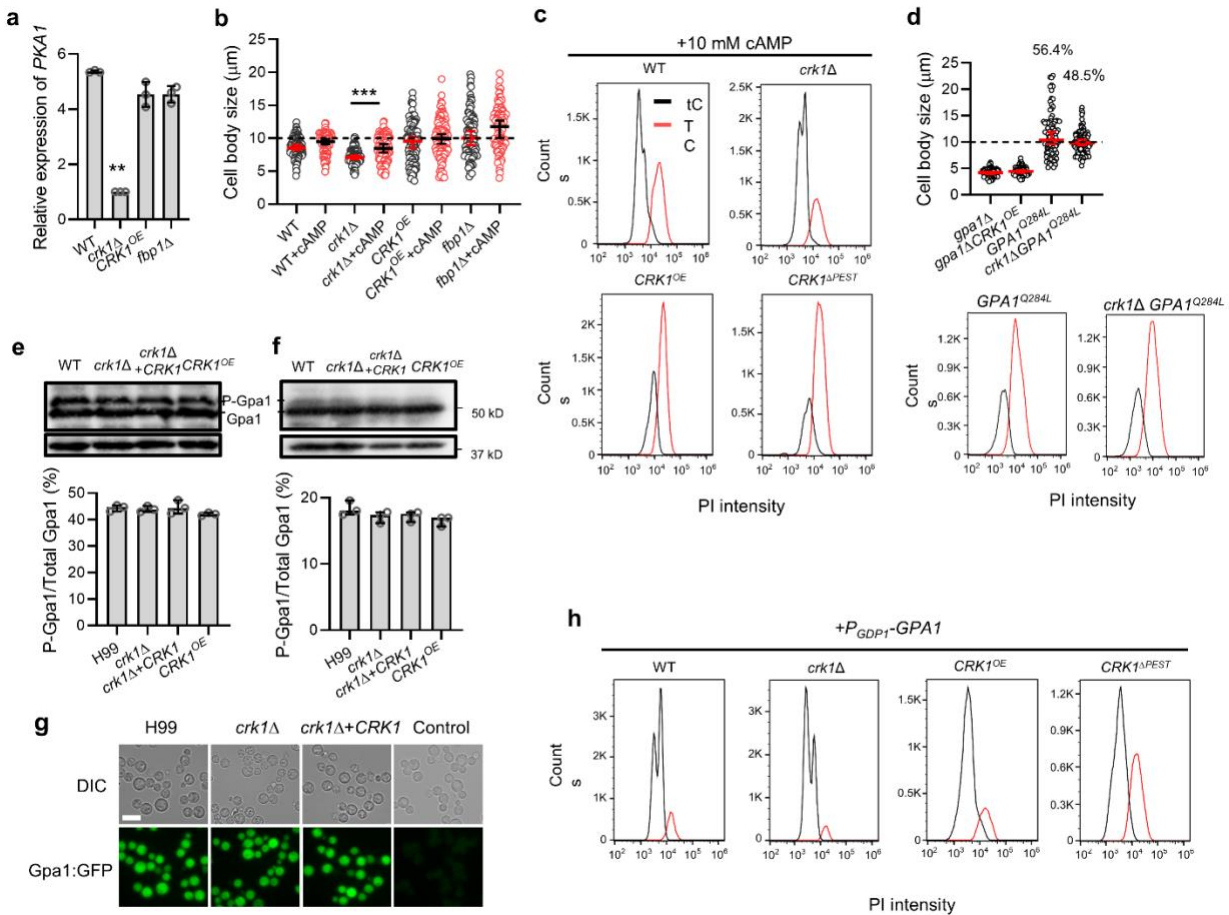

**Supplementary Figure 6 Crk1 regulates titan cell formation through the Gpa1-cAMP signaling pathway.** **a** Relative expression levels of *PKA1* in wild type H99, the *crk1Δ* mutant, the *CRK1<sup>OE</sup>* strain, and the *fbp1Δ* mutant under titan cell inducing conditions. The expression level of *wild type* was set as 1. The data shown are cumulated from three independent experiments. Statistical analysis was performed with the two-sided Kruskal-Wallis nonparametric test for multiple comparisons. \*\*,  $P = 0.002$ . **b** Cell size under in vitro titan cell inducing conditions in the absence or presence of 10 mM extracellular cAMP. Error bar indicates 95% confidence interval of the median for 100 cells. Statistical analysis was performed based on two-sided Mann-whitney test. \*\*\*,  $P = 0.0002$ . **c** FACS analysis of DNA content following PI staining. Cells were cultured under titan cell inducing conditions in the presence of 10 mM cAMP for 3 days and analyzed by flow cytometry. The population of titan cells showed increased PI fluorescence intensity to >2C. **d** Measurement of cell size of indicated strains after 3 days of incubation in titan cell inducing

conditions and FACS analysis of DNA content of PI-stained cells. Error bar indicates 95% confidence interval of the median for more than 100 cells. **e-f** Gpa1 phosphorylation in nitrogen starvation condition (**e**) and in YPD rich medium (**f**). No significant difference was detected by Kruskal-Wallis nonparametric test for multiple comparisons. Strains expressing Gpa1:FLAG were grown in different conditions and total protein was analyzed by western blotting with FLAG antibody. Error bars indicate the standard deviation of the mean of three independent experiments. **g** The expression of Gpa1:GFP was detected by fluorescence microscopy. Cells without GFP expression were used as a control. Images are representative of three independent experiments. Bar, 5  $\mu$ m. **h** FACS analysis of DNA content of PI-stained cells. Cells were cultured under titan cell inducing conditions for 3 days and analyzed by flow cytometry. The population of titan cells showed increased PI fluorescence intensity to  $>2C$ . Source data are provided as a Source Data file.

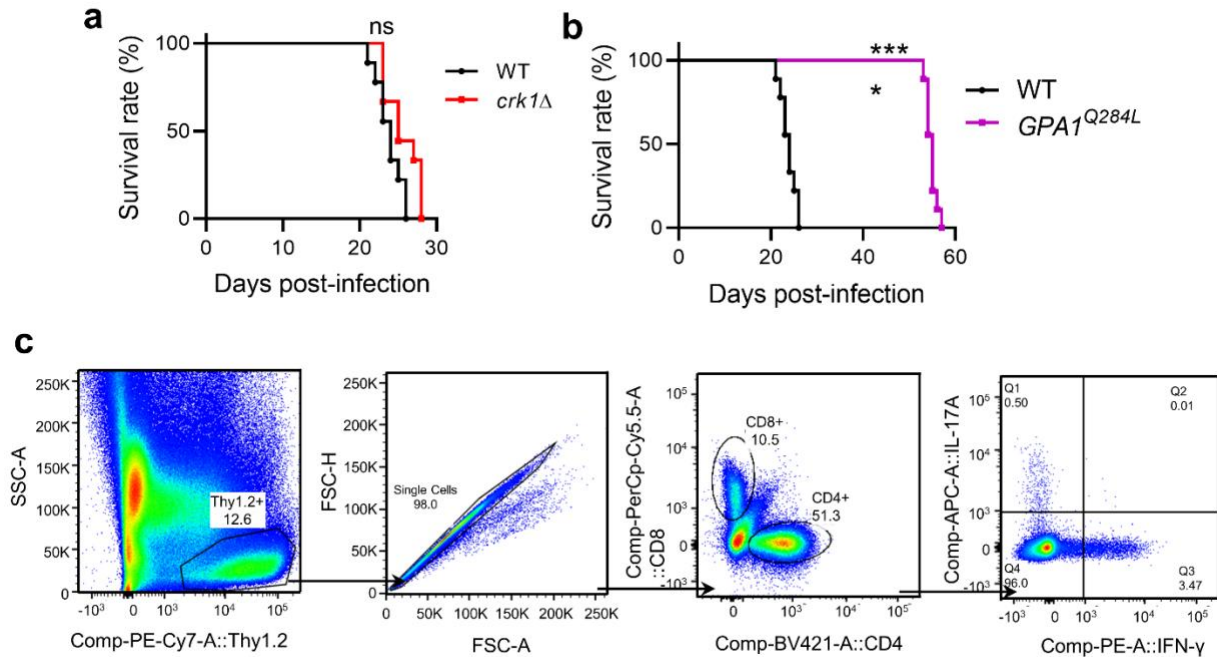

**Supplementary Figure 7 Survival curves for mice after intranasal infection.** **a** Female BalB/c mice were intranasally inoculated with  $10^5$  WT or the *crk1Δ* mutant and their survival rates were plotted against the number of days following inoculation. **b** Survival curves of female BalB/c mice intranasally inoculated with  $10^5$  cells of the WT or the Gpa1 dominant active allele (*GPA1<sup>Q284L</sup>*) strain. Statistical analysis was performed based on Log-rank (Mantel-Cox) test. \*\*\*\*\*,  $P < 0.0001$ . Source data are provided as a Source Data file. **c** Lymphocytes were gated through the SSC-A Vs Thy1.2, following gate on FSC-A Vs FSC-H to gate on single cells. Then, Thy1.2<sup>+</sup> singlets were gated on CD4 Vs CD8 to identify CD4<sup>+</sup> T cells and CD8<sup>+</sup> T cells. The comparison on cytokine production on CD4<sup>+</sup> T cells were further gated on IFN- $\gamma$  Vs IL-17A.
