# Supplementary material for: Ubiquitin proteolysis of a CDK-related kinase regulates titan cell formation and virulence in the fungal pathogen Cryptococcus neoformans
Source: PubMed Central journal article supplement (PMC9613880; doi:10.1038/s41467-022-34151-6), 2022-10-27
Supplement: 41467_2022_34151_MOESM3_ESM.pdf [file 41467_2022_34151_MOESM3_ESM.pdf]

## Description of Additional Supplementary Files

**Title:** Supplementary Data 1.

**Description:** Analyses of differentially expressed genes in *fbp1Δ* vs WT, *CRK1<sup>OE</sup>* vs WT, and *CRK1<sup>ΔPEST</sup>* vs WT in titan cell-inducing conditions.
